# Supplementary material for: Choquet-Integral Aggregation Method to Aggregate Social Indicators to Account for Interactions: An Application to the Human Development Index
Source: Springer Nature journal article supplement (doi:10.1007/s11205-021-02726-3), 2021-06-21
Supplement: MOESM3 [file 19281216]

Income	Health	Education
0.432	0.684	0.413
0.727	0.899	0.758
0.743	0.872	0.675
0.935	0.951	0.708
0.607	0.627	0.498
0.816	0.875	0.655
0.781	0.87	0.842
0.684	0.845	0.759
0.92	0.974	0.923
0.927	0.945	0.871
0.759	0.813	0.694
0.853	0.827	0.741
0.907	0.879	0.738
0.559	0.805	0.513
0.766	0.909	0.773
0.776	0.84	0.837
0.919	0.946	0.893
0.645	0.838	0.691
0.462	0.638	0.476
0.673	0.792	0.441
0.638	0.788	0.69
0.732	0.881	0.706
0.766	0.758	0.664
0.747	0.857	0.689
1	0.857	0.703
0.798	0.845	0.805
0.428	0.633	0.3
0.285	0.635	0.418
0.541	0.576	0.441
0.631	0.812	0.538
0.541	0.763	0.476
0.528	0.599	0.564
0.918	0.959	0.891
0.31	0.505	0.353
0.429	0.523	0.288
0.815	0.924	0.807
0.768	0.872	0.649
0.734	0.879	0.683
0.482	0.679	0.476
0.613	0.681	0.539
0.314	0.621	0.495
0.755	0.925	0.716
0.822	0.898	0.796
0.658	0.903	0.791
0.876	0.936	0.811
0.869	0.911	0.892
0.935	0.935	0.92
0.541	0.717	0.313
0.684	0.894	0.62
0.758	0.829	0.657
0.698	0.874	0.714
0.706	0.797	0.608
0.641	0.817	0.566
0.783	0.591	0.441
0.429	0.707	0.269
0.863	0.901	0.881
0.686	0.606	0.541
0.435	0.711	0.335
0.682	0.728	0.764
0.912	0.95	0.915
0.907	0.962	0.811
0.765	0.711	0.636
0.408	0.642	0.386
0.689	0.825	0.856
0.929	0.941	0.946
0.561	0.674	0.559
0.834	0.955	0.833
0.732	0.806	0.755
0.65	0.832	0.511
0.468	0.634	0.34
0.418	0.585	0.402
0.654	0.766	0.601
0.425	0.672	0.445
0.567	0.848	0.503
0.967	0.995	0.86
0.846	0.872	0.816
0.931	0.967	0.918
0.638	0.76	0.558
0.714	0.792	0.625
0.786	0.869	0.743
0.761	0.776	0.554
0.955	0.955	0.918
0.879	0.966	0.876
0.89	0.975	0.793
0.661	0.836	0.692
0.908	0.992	0.85
0.667	0.837	0.678
0.816	0.819	0.817
0.516	0.713	0.526
0.554	0.74	0.59
0.892	0.967	0.862
0.992	0.852	0.625
0.529	0.79	0.734
0.626	0.732	0.481
0.842	0.849	0.871
0.712	0.906	0.604
0.526	0.519	0.51
0.354	0.673	0.422
0.719	0.811	0.607
1	0.931	0.827
0.86	0.858	0.89
0.98	0.955	0.802
0.399	0.718	0.493
0.37	0.674	0.459
0.847	0.862	0.713
0.73	0.902	0.564
0.45	0.598	0.29
0.884	0.96	0.818
0.579	0.829	0.707
0.547	0.688	0.389
0.82	0.844	0.73
0.781	0.846	0.684
0.545	0.735	0.578
0.638	0.797	0.708
0.707	0.764	0.734
0.78	0.873	0.797
0.652	0.869	0.547
0.369	0.618	0.389
0.612	0.721	0.452
0.691	0.667	0.582
0.501	0.777	0.501
0.939	0.956	0.906
0.885	0.956	0.923
0.584	0.835	0.566
0.334	0.647	0.247
0.594	0.528	0.486
0.734	0.857	0.697
0.985	0.958	0.919
0.893	0.887	0.732
0.597	0.725	0.407
0.773	0.826	0.845
0.6	0.829	0.66
0.804	0.897	0.697
0.545	0.681	0.432
0.72	0.833	0.634
0.727	0.869	0.692
0.689	0.786	0.667
0.849	0.901	0.866
0.851	0.952	0.759
1	0.925	0.661
0.827	0.86	0.762
0.834	0.806	0.832
0.449	0.749	0.457
0.844	0.839	0.661
0.717	0.862	0.668
0.72	0.806	0.664
0.616	0.818	0.701
0.515	0.772	0.567
0.937	0.846	0.794
0.526	0.733	0.352
0.759	0.859	0.783
0.835	0.821	0.752
0.397	0.528	0.403
1	0.976	0.837
0.865	0.883	0.824
0.872	0.941	0.893
0.455	0.813	0.469
0.72	0.675	0.721
0.404	0.579	0.301
0.885	0.976	0.824
0.718	0.874	0.756
0.556	0.694	0.339
0.722	0.793	0.661
0.932	0.964	0.914
0.965	0.979	0.896
0.499	0.797	0.416
0.536	0.783	0.673
0.504	0.693	0.423
0.768	0.876	0.665
0.653	0.758	0.496
0.418	0.627	0.514
0.613	0.782	0.771
0.854	0.821	0.728
0.706	0.869	0.659
0.833	0.884	0.712
0.77	0.74	0.628
0.433	0.661	0.515
0.662	0.799	0.797
0.983	0.889	0.744
0.903	0.942	0.916
0.956	0.905	0.899
0.796	0.889	0.745
0.63	0.793	0.718
0.504	0.774	0.545
0.681	0.802	0.7
0.624	0.851	0.626
0.402	0.709	0.347
0.541	0.669	0.572
0.496	0.634	0.568
